# Supplementary material for: Metabolic Serum Profiles for Patients Receiving Allogeneic Stem Cell Transplantation: The Pretransplant Profile Differs for Patients with and without Posttransplant Capillary Leak Syndrome
Source: Hindawi journal article supplement (doi:10.1155/2015/943430), 2015-01-01
Supplement: f1 [file 943430.f1.pdf]

**Supplementary Table 1. Classification of all metabolites analysed in the study, the pathways showing pretransplant alterations in patients with posttransplant capillary leak syndrome are marked with yellow. The marked pathways represent an extended list compared with the pathways presented in Figure 3; the ratio from the bioinformatical analysis is given for each Sub Pathway in parenthesis.**

| Super Pathway | Sub Pathway                              | Biochemical Name                   | KEGG   | PUBCHEM | HMDB      |
|---------------|------------------------------------------|------------------------------------|--------|---------|-----------|
| Amino Acid    | Glycine, Serine and Threonine Metabolism | glycine                            | C00037 | 750     | HMDB00123 |
|               |                                          | N-acetylglycine                    |        | 10972   | HMDB00532 |
|               |                                          | dimethylglycine                    | C01026 | 673     | HMDB00092 |
|               |                                          | betaine                            | C00719 | 247     | HMDB00043 |
|               |                                          | serine                             | C00065 | 5951    | HMDB00187 |
|               |                                          | N-acetylserine                     |        | 65249   | HMDB02931 |
|               |                                          | threonine                          | C00188 | 6288    | HMDB00167 |
|               |                                          | N-acetylthreonine                  | C01118 | 152204  |           |
|               |                                          | O-acetylhomoserine                 | C01077 | 439389  |           |
|               | Alanine and Aspartate Metabolism         | alanine                            | C00041 | 5950    | HMDB00161 |
|               |                                          | N-acetylalanine                    | C02847 | 88064   | HMDB00766 |
|               |                                          | aspartate                          | C00049 | 5960    | HMDB00191 |
|               |                                          | asparagine                         | C00152 | 6267    | HMDB00168 |
|               |                                          | N-acetylaspargate (NAA)            | C01042 | 65065   | HMDB00812 |
|               | Glutamate Metabolism                     | glutamate                          | C00025 | 611     | HMDB00148 |
|               |                                          | glutamine                          | C00064 | 5961    | HMDB00641 |
|               |                                          | N-acetylglutamate                  | C00624 | 70914   | HMDB01138 |
|               |                                          | N-acetylglutamine                  | C02716 | 182230  | HMDB06029 |
|               |                                          | N-acetyl-aspartyl-glutamate (NAAG) | C12270 | 5255    | HMDB01067 |
|               |                                          | pyroglutamine*                     |        | 134508  |           |
|               | Histidine Metabolism                     | histidine                          | C00135 | 6274    | HMDB00177 |
|               |                                          | N-acetylhistidine                  | C02997 | 75619   | HMDB32055 |
|               |                                          | 1-methylhistidine                  | C01152 | 92105   | HMDB00001 |
|               |                                          | 3-methylhistidine                  | C01152 | 64969   | HMDB00479 |
|               |                                          | N-acetyl-3-methylhistidine*        |        | 193270  |           |
|               |                                          | N-acetyl-1-methylhistidine*        |        |         |           |
|               |                                          | hydantoin-5-propionic acid         | C05565 | 782     | HMDB01212 |

|  |                                              |                                |        |          |           |
|--|----------------------------------------------|--------------------------------|--------|----------|-----------|
|  |                                              | trans-urocanate                | C00785 | 736715   | HMDB00301 |
|  |                                              | imidazole propionate           |        | 70630    | HMDB02271 |
|  |                                              | imidazole lactate              | C05568 | 440129   | HMDB02320 |
|  |                                              | 1-methylimidazoleacetate       | C05828 | 75810    | HMDB02820 |
|  |                                              | 4-imidazoleacetate             | C02835 | 96215    | HMDB02024 |
|  | Lysine Metabolism                            | lysine                         | C00047 | 5962     | HMDB00182 |
|  |                                              | N2-acetyllysine                | C12989 | 92907    | HMDB00446 |
|  |                                              | N6-acetyllysine                | C02727 | 92832    | HMDB00206 |
|  |                                              | N-6-trimethyllysine            | C03793 | 440120   | HMDB01325 |
|  |                                              | 2-aminoadipate                 | C00956 | 469      | HMDB00510 |
|  |                                              | glutarate (pentanedioate)      | C00489 | 743      | HMDB00661 |
|  |                                              | glutaryl carnitine (C5)        |        | 71464488 | HMDB13130 |
|  |                                              | 3-methylglutaryl carnitine (1) |        | 128145   | HMDB00552 |
|  |                                              | 3-methylglutaryl carnitine (2) |        | 128145   | HMDB00552 |
|  |                                              | pipecolate                     | C00408 | 849      | HMDB00070 |
|  | Phenylalanine and Tyrosine Metabolism (1.96) | phenylalanine                  | C00079 | 6140     | HMDB00159 |
|  |                                              | N-acetylphenylalanine          | C03519 | 74839    | HMDB00512 |
|  |                                              | phenylpyruvate                 | C00166 | 997      | HMDB00205 |
|  |                                              | phenyllactate (PLA)            | C05607 | 3848     | HMDB00779 |
|  |                                              | phenylacetate                  | C07086 | 999      | HMDB00209 |
|  |                                              | 4-hydroxyphenylacetate         | C00642 | 127      | HMDB00020 |
|  |                                              | phenylacetylglutamine          | C04148 | 92258    | HMDB06344 |
|  |                                              | tyrosine                       | C00082 | 6057     | HMDB00158 |
|  |                                              | N-acetyltyrosine               |        | 68310    | HMDB00866 |
|  |                                              | 4-hydroxyphenylpyruvate        | C01179 | 979      | HMDB00707 |
|  |                                              | 3-(4-hydroxyphenyl)lactate     | C03672 | 9378     | HMDB00755 |
|  |                                              | phenol sulfate                 | C02180 | 74426    | HMDB60015 |
|  |                                              | p-cresol sulfate               | C01468 | 4615423  | HMDB11635 |
|  |                                              | o-cresol sulfate               |        | 11615528 |           |
|  |                                              | vanillylmandelate (VMA)        | C05584 | 1245     | HMDB00291 |
|  |                                              | 3-methoxytyrosine              |        | 1670     | HMDB01434 |
|  |                                              | 3-methoxytyramine sulfate      |        |          |           |
|  |                                              | homovanillate (HVA)            | C05582 | 1738     | HMDB00118 |

|  |                                           |                                      |        |          |           |
|--|-------------------------------------------|--------------------------------------|--------|----------|-----------|
|  |                                           | gentisate                            | C00628 | 3469     | HMDB00152 |
|  |                                           | 3-[3-(sulfooxy)phenyl]propanoic acid |        | 187488   |           |
|  |                                           | 3-(3-hydroxyphenyl)propionate        | C11457 | 91       | HMDB00375 |
|  |                                           | 3-(4-hydroxyphenyl)propionate        | C01744 | 10394    | HMDB02199 |
|  |                                           | 3-phenylpropionate (hydrocinnamate)  | C05629 | 107      | HMDB00764 |
|  |                                           | thyroxine                            | C01829 | 5819     | HMDB01918 |
|  |                                           | 5-hydroxymethyl-2-furoic acid        | C20448 | 80642    | HMDB02432 |
|  |                                           | 2-hydroxyphenylacetate               | C05852 | 11970    | HMDB00669 |
|  | Tryptophan Metabolism (3.00)              | tryptophan                           | C00078 | 6305     | HMDB00929 |
|  |                                           | N-acetyltryptophan                   | C03137 | 700653   | HMDB13713 |
|  |                                           | indolelactate                        | C02043 | 92904    | HMDB00671 |
|  |                                           | indoleacetate                        | C00954 | 802      | HMDB00197 |
|  |                                           | indolepropionate                     |        | 3744     | HMDB02302 |
|  |                                           | 3-indoxyl sulfate                    |        | 10258    | HMDB00682 |
|  |                                           | kynurenine                           | C00328 | 161166   | HMDB00684 |
|  |                                           | kynurenate                           | C01717 | 3845     | HMDB00715 |
|  |                                           | 3-hydroxykynurenine                  | C02794 | 89       | HMDB00732 |
|  |                                           | xanthurenate                         | C02470 | 5699     | HMDB00881 |
|  |                                           | 5-hydroxyindoleacetate               | C05635 | 1826     | HMDB00763 |
|  |                                           | serotonin (5HT)                      | C00780 | 5202     | HMDB00259 |
|  |                                           | indolebutyrate                       | C11284 | 8617     | HMDB02096 |
|  |                                           | indoleacetylglutamine                |        | 25200879 | HMDB13240 |
|  |                                           | tryptophan betaine                   | C09213 | 442106   | HMDB61115 |
|  |                                           | C-glycosyltryptophan*                |        |          |           |
|  |                                           | indole-3-carboxylic acid             | C19837 | 69867    | HMDB03320 |
|  | Leucine, Isoleucine and Valine Metabolism | leucine                              | C00123 | 6106     | HMDB00687 |
|  |                                           | N-acetylleucine                      | C02710 | 70912    | HMDB11756 |
|  |                                           | 4-methyl-2-oxopentanoate             | C00233 | 70       | HMDB00695 |
|  |                                           | isovalerate                          | C08262 | 10430    | HMDB00718 |

|  |                                                         |                                     |        |               |           |
|--|---------------------------------------------------------|-------------------------------------|--------|---------------|-----------|
|  |                                                         | isovalerylglycine                   |        | 546304        | HMDB00678 |
|  |                                                         | isovalerylcarnitine                 |        | 6426851       | HMDB00688 |
|  |                                                         | 3-methylcrotonylglycine             |        | 169485        | HMDB00459 |
|  |                                                         | beta-hydroxyisovalerate             |        | 69362         | HMDB00754 |
|  |                                                         | beta-hydroxyisovaleroylcarnitine    |        |               |           |
|  |                                                         | alpha-hydroxyisovaleroyl carnitine* |        |               |           |
|  |                                                         | alpha-hydroxyisovalerate            |        | 99823         | HMDB00407 |
|  |                                                         | methylsuccinate                     |        | 10349         | HMDB01844 |
|  |                                                         | isoleucine                          | C00407 | 6306          | HMDB00172 |
|  |                                                         | allo-isoleucine                     |        | 6950182;99288 |           |
|  |                                                         | N-acetylisoleucine                  |        | 2802421       |           |
|  |                                                         | 3-methyl-2-oxovalerate              | C00671 | 47            | HMDB03736 |
|  |                                                         | 2-methylbutyrylcarnitine (C5)       |        | 6426901       | HMDB00378 |
|  |                                                         | 2-methylbutyrylglycine              |        | 193872        | HMDB00339 |
|  |                                                         | tiglyl carnitine                    |        | 22833596      | HMDB02366 |
|  |                                                         | tigloylglycine                      |        | 6441567       | HMDB00959 |
|  |                                                         | 2-hydroxy-3-methylvalerate          |        | 164623        | HMDB00317 |
|  |                                                         | 3-hydroxy-2-ethylpropionate         |        | 188979        | HMDB00396 |
|  |                                                         | ethylmalonate                       |        | 11756         | HMDB00622 |
|  |                                                         | valine                              | C00183 | 6287          | HMDB00883 |
|  |                                                         | N-acetylvaline                      |        | 66789         | HMDB11757 |
|  |                                                         | 3-methyl-2-oxobutyrates             | C00141 | 49            | HMDB00019 |
|  |                                                         | isobutyrylcarnitine                 |        | 168379        | HMDB00736 |
|  |                                                         | isobutyrylglycine                   |        | 10855600      | HMDB00730 |
|  |                                                         | 3-hydroxyisobutyrates               | C06001 | 87            | HMDB00336 |
|  |                                                         | alpha-hydroxyisocaproate            | C03264 | 83697         | HMDB00746 |
|  | Methionine, Cysteine, SAM and Taurine Metabolism (6.38) | methionine                          | C00073 | 6137          | HMDB00696 |
|  |                                                         | N-acetylmethionine                  | C02712 | 448580        | HMDB11745 |
|  |                                                         | N-formylmethionine                  | C03145 | 439750        | HMDB01015 |
|  |                                                         | methionine sulfone                  |        | 69961         |           |
|  |                                                         | methionine sulfoxide                | C02989 | 158980        | HMDB02005 |

|  |                                                    |                                |        |          |           |
|--|----------------------------------------------------|--------------------------------|--------|----------|-----------|
|  |                                                    | S-adenosylhomocysteine (SAH)   | C00021 | 439155   | HMDB00939 |
|  |                                                    | alpha-ketobutyrate             | C00109 | 58       | HMDB00005 |
|  |                                                    | 2-aminobutyrate                | C02261 | 439691   | HMDB00650 |
|  |                                                    | 2-hydroxybutyrate (AHB)        | C05984 | 440864   | HMDB00008 |
|  |                                                    | cysteine                       | C00097 | 5862     | HMDB00574 |
|  |                                                    | cystine                        | C00491 | 67678    | HMDB00192 |
|  |                                                    | S-methylcysteine               |        | 24417    | HMDB02108 |
|  |                                                    | cysteine s-sulfate             | C05824 | 115015   | HMDB00731 |
|  |                                                    | hypotaurine                    | C00519 | 107812   | HMDB00965 |
|  |                                                    | taurine                        | C00245 | 1123     | HMDB00251 |
|  |                                                    | N-acetyltaurine                |        | 159864   |           |
|  | Urea cycle; Arginine and Proline Metabolism (7.86) | arginine                       | C00062 | 232      | HMDB00517 |
|  |                                                    | urea                           | C00086 | 1176     | HMDB00294 |
|  |                                                    | ornithine                      | C00077 | 6262     | HMDB03374 |
|  |                                                    | proline                        | C00148 | 145742   | HMDB00162 |
|  |                                                    | citrulline                     | C00327 | 9750     | HMDB00904 |
|  |                                                    | homoarginine                   | C01924 | 9085     | HMDB00670 |
|  |                                                    | homocitrulline                 | C02427 | 65072    | HMDB00679 |
|  |                                                    | dimethylarginine (SDMA + ADMA) | C03626 | 123831   | HMDB01539 |
|  |                                                    | N-acetylarginine               | C02562 | 67427    | HMDB04620 |
|  |                                                    | N-delta-acetylornithine        |        | 9920500  |           |
|  |                                                    | N-methyl proline               |        | 557      |           |
|  |                                                    | trans-4-hydroxyproline         | C01157 | 5810     | HMDB00725 |
|  |                                                    | pro-hydroxy-pro                |        | 11673055 | HMDB06695 |
|  | Creatine Metabolism                                | creatine                       | C00300 | 586      | HMDB00064 |
|  |                                                    | creatinine                     | C00791 | 588      | HMDB00562 |
|  |                                                    | guanidinoacetate               | C00581 | 763      | HMDB00128 |
|  | Polyamine Metabolism                               | acisoga                        |        | 129397   |           |
|  |                                                    | 5-methylthioadenosine (MTA)    | C00170 | 439176   | HMDB01173 |
|  |                                                    | N-acetylputrescine             | C02714 | 122356   | HMDB02064 |
|  |                                                    | 4-acetamidobutanoate           | C02946 | 18189    | HMDB03681 |
|  | Guanidino and Acetamido                            | 4-guanidinobutanoate           | C01035 | 500      | HMDB03464 |

|         |                           |                                |        |                |           |
|---------|---------------------------|--------------------------------|--------|----------------|-----------|
|         | Metabolism                | guanidinosuccinate             | C03139 | 97856          | HMDB03157 |
|         | Glutathione Metabolism    | cysteine-glutathione disulfide |        | 4247235        | HMDB00656 |
|         |                           | cys-gly, oxidized              |        | 333293         |           |
|         |                           | 5-oxoproline                   | C01879 | 7405           | HMDB00267 |
| Peptide | Gamma-glutamyl Amino Acid | gamma-glutamylalanine          |        | 440103         |           |
|         |                           | gamma-glutamylglutamate        | C05282 | 92865          | HMDB11737 |
|         |                           | gamma-glutamylglutamine        | C05283 | 150914         | HMDB11738 |
|         |                           | gamma-glutamylglycine          |        | 165527         | HMDB11667 |
|         |                           | gamma-glutamylhistidine        |        | 7017195        |           |
|         |                           | gamma-glutamylisoleucine*      |        | 14253342       | HMDB11170 |
|         |                           | gamma-glutamylleucine          |        | 151023         | HMDB11171 |
|         |                           | gamma-glutamyllysine           |        | 65254;14284565 | HMDB03869 |
|         |                           | gamma-glutamylmethionine       |        | 7009567        |           |
|         |                           | gamma-glutamylphenylalanine    |        | 111299         | HMDB00594 |
|         |                           | gamma-glutamylthreonine*       |        |                |           |
|         |                           | gamma-glutamyltryptophan       |        | 3989307        |           |
|         |                           | gamma-glutamyltyrosine         |        | 94340          | HMDB11741 |
|         |                           | gamma-glutamylvaline           |        | 7015683        | HMDB11172 |
|         |                           | gamma-glutamyl-2-aminobutyrate |        |                |           |
|         | Dipeptide Derivative      | N-acetylcarnosine              |        | 9903482        | HMDB12881 |
|         | Dipeptide                 | alanylleucine                  |        | 259583         |           |
|         |                           | alanylphenylalanine            |        | 2080           |           |
|         |                           | alpha-glutamylglutamate        | C01425 | 439500         | HMDB28818 |
|         |                           | alpha-glutamyltyrosine         |        | 351830         |           |
|         |                           | asparagylvaline                |        | 7019993        |           |
|         |                           | aspartylleucine                |        | 332962         |           |
|         |                           | aspartylphenylalanine          |        | 93078          | HMDB00706 |
|         |                           | cyclo(gly-pro)                 |        | 126154         |           |
|         |                           | cyclo(leu-pro)                 |        | 7074739        |           |
|         |                           | cyclo(L-phe-D-pro)*            |        | 6992198        |           |
|         |                           | cyclo(L-phe-L-pro)             | C11847 | 9837725;443440 |           |

|  |                       |        |                 |           |
|--|-----------------------|--------|-----------------|-----------|
|  | glutamine-leucine     |        |                 |           |
|  | glycylglycine         | C02037 | 11163           | HMDB11733 |
|  | glycylisoleucine      |        | 88079           |           |
|  | glycylleucine         | C02155 | 92843           | HMDB00759 |
|  | glycylphenylalanine   |        | 92953           | HMDB28848 |
|  | glycylproline         |        | 3013625         | HMDB00721 |
|  | glycyltryptophan      |        | 1551340;92181   |           |
|  | glycyltyrosine        |        | 92829           | HMDB28853 |
|  | glycylvaline          |        | 97417           | HMDB28854 |
|  | histidylalanine       |        | 351667          |           |
|  | histidylleucine       |        | 189008;6992010  |           |
|  | histidylphenylalanine |        | 4466133         |           |
|  | histidyltryptophan    |        | 6539217         |           |
|  | isoleucylalanine      |        | 5246009;5246010 |           |
|  | isoleucylaspartate    |        |                 |           |
|  | isoleucylglutamine    |        | 7020102         |           |
|  | isoleucylglycine      |        | 342532          |           |
|  | isoleucylisoleucine   |        | 7010568         |           |
|  | isoleucylleucine      |        | 11644431        |           |
|  | isoleucylvaline       |        | 5246011;435949  |           |
|  | leucylalanine         |        | 259321          |           |
|  | leucylaspartate       |        | 3328705         |           |
|  | leucylglutamate       |        | 5259589;5259590 |           |
|  | leucylglycine         |        | 79070           |           |
|  | leucylisoleucine      |        | 7010534         |           |
|  | leucylleucine         | C11332 | 76807           | HMDB28933 |
|  | leucylphenylalanine   |        | 259325          |           |
|  | leucylserine          |        | 3621685         |           |
|  | lysylleucine          |        | 4682588         |           |
|  | phenylalanylalanine   |        | 6993123;5488196 |           |
|  | phenylalanylarginine  |        | 10268029        |           |
|  | phenylalanylaspartate |        | 335051          |           |
|  | phenylalanylglutamate |        | 4422358         |           |

|              |                                  |                              |        |                 |           |
|--------------|----------------------------------|------------------------------|--------|-----------------|-----------|
|              |                                  | phenylalanylglycine          |        | 98207           |           |
|              |                                  | phenylalanylleucine          |        | 4078229         |           |
|              |                                  | phenylalanylphenylalanine    |        | 6993090;6993089 |           |
|              |                                  | phenylalanyls erine          |        | 9859812         |           |
|              |                                  | phenylalanyltryptophan       |        |                 |           |
|              |                                  | phenylalanylvaline           |        | 4096934         |           |
|              |                                  | prolylglycine                |        | 7408076;6426709 |           |
|              |                                  | prolylphenylalanine          |        | 5226097         |           |
|              |                                  | prolylvaline                 |        | 152307;6992339  |           |
|              |                                  | pyroglutamylglutamine        |        |                 |           |
|              |                                  | pyroglutamylglycine          |        | 152981          |           |
|              |                                  | pyroglutamylvaline           |        | 152416          |           |
|              |                                  | serylalanine                 |        |                 |           |
|              |                                  | serylleucine                 |        | 7015695         |           |
|              |                                  | seryltyrosine                |        | 4575735         |           |
|              |                                  | threonylphenylalanine        |        | 4099799;4099798 |           |
|              |                                  | tryptophylasparagine         |        |                 |           |
|              |                                  | tryptophylglutamate          |        | 3634442         |           |
|              |                                  | tryptophylphenylalanine      |        | 4427709         |           |
|              |                                  | tyrosylglutamate             |        | 7009628         |           |
|              |                                  | tyrosylglutamine             |        |                 |           |
|              |                                  | tyrosylglycine               |        | 259323          |           |
|              |                                  | valylarginine                |        | 4266827         |           |
|              |                                  | valylglycine                 |        | 136487          |           |
|              |                                  | valylisoleucine              |        | 5246012;5246013 |           |
|              |                                  | valylleucine                 |        | 352039          |           |
|              |                                  | cis-Cyclo[L-ala-L-Pro]       |        | 6428987         |           |
|              | Polypeptide                      | bradykinin, des-arg(9)       | C00306 | 105044          | HMDB04246 |
|              |                                  | HWESASXX*                    |        |                 |           |
|              |                                  | XHWESASXXR*                  |        |                 |           |
|              | Fibrinogen Cleavage Peptide      | ADSGEGDFXAEGGGVR*            |        | 16133137        |           |
|              |                                  | DSGEGDFXAEGGGVR*             |        |                 |           |
| Carbohydrate | Glycolysis, Gluconeogenesis, and | 1,5-anhydroglucitol (1,5-AG) | C07326 | 64960           | HMDB02712 |

|        |                                            |                                        |               |         |                      |
|--------|--------------------------------------------|----------------------------------------|---------------|---------|----------------------|
|        | Pyruvate Metabolism                        | glucose                                | C00031        | 79025   | HMDB00122            |
|        |                                            | pyruvate                               | C00022        | 1060    | HMDB00243            |
|        |                                            | lactate                                | C00186        | 612     | HMDB00190            |
|        |                                            | glycerate                              | C00258        | 752     | HMDB00139            |
|        | Pentose Metabolism                         | ribulose                               | C00309        | 151261  | HMDB00621            |
|        |                                            | ribose                                 | C00121        | 5779    | HMDB00283            |
|        |                                            | ribitol                                | C00474        | 6912    | HMDB00508            |
|        |                                            | xylonate                               | C05411        | 6602431 | HMDB060256           |
|        |                                            | xylose                                 | C00181        | 135191  | HMDB00098            |
|        |                                            | xylitol                                | C00379        | 6912    | HMDB02917            |
|        |                                            | arabinose                              | C00216        | 66308   | HMDB00646            |
|        |                                            | threitol                               | C16884        | 169019  | HMDB04136            |
|        |                                            | arabitol                               | C01904        | 94154   | HMDB01851            |
|        |                                            | fucose                                 | C01018        | 19466   | HMDB00174            |
|        | Disaccharides and Oligosaccharides         | sucrose                                | C00089        | 5988    | HMDB00258            |
|        | Fructose, Mannose and Galactose Metabolism | fructose                               | C00095        | 5984    | HMDB00660            |
|        |                                            | sorbitol                               | C00794        | 5780    | HMDB00247            |
|        |                                            | mannose                                | C00159        | 18950   | HMDB00169            |
|        |                                            | mannitol                               | C00392        | 6251    | HMDB00765            |
|        |                                            | galactonate                            | C00880        | 128869  | HMDB00565            |
|        | Aminosugar Metabolism (17.02)              | glucuronate                            | C00191        | 444791  | HMDB00127            |
|        |                                            | N-acetylneuraminate                    | C00270        | 439197  | HMDB00230            |
|        |                                            | erythronate*                           |               | 2781043 | HMDB00613            |
| Energy | TCA Cycle                                  | citrate                                | C00158        | 311     | HMDB00094            |
|        |                                            | aconitate [cis or trans] - group 51105 | C00417,C02341 |         | HMDB00072, HMDB00958 |
|        |                                            | alpha-ketoglutarate                    | C00026        | 51      | HMDB00208            |
|        |                                            | succinylcarnitine                      |               |         |                      |
|        |                                            | succinate                              | C00042        | 1110    | HMDB00254            |
|        |                                            | fumarate                               | C00122        | 444972  | HMDB00134            |
|        |                                            | malate                                 | C00149        | 525     | HMDB00156            |
|        | Oxidative Phosphorylation                  | acetylphosphate                        | C00227        | 186     | HMDB01494            |

|       |                                        |                                    |        |         |           |
|-------|----------------------------------------|------------------------------------|--------|---------|-----------|
|       |                                        | phosphate                          | C00009 | 1061    | HMDB01429 |
| Lipid | Short Chain Fatty Acid                 | valerate                           | C00803 | 7991    | HMDB00892 |
|       | Medium Chain Fatty Acid                | caproate (6:0)                     | C01585 | 8892    | HMDB00535 |
|       |                                        | caprylate (8:0)                    | C06423 | 379     | HMDB00482 |
|       |                                        | caprate (10:0)                     | C01571 | 2969    | HMDB00511 |
|       |                                        | 10-undecenoate (11:1n1)            |        |         |           |
|       |                                        | laurate (12:0)                     | C02679 | 3893    | HMDB00638 |
|       |                                        | 5-dodecenoate (12:1n7)             |        | 5312378 | HMDB00529 |
|       | Long Chain Fatty Acid                  | myristate (14:0)                   | C06424 | 11005   | HMDB00806 |
|       |                                        | myristoleate (14:1n5)              | C08322 | 5281119 | HMDB02000 |
|       |                                        | pentadecanoate (15:0)              | C16537 | 13849   | HMDB00826 |
|       |                                        | palmitate (16:0)                   | C00249 | 985     | HMDB00220 |
|       |                                        | palmitoleate (16:1n7)              | C08362 | 445638  | HMDB03229 |
|       |                                        | margarate (17:0)                   |        | 10465   | HMDB02259 |
|       |                                        | 10-heptadecenoate (17:1n7)         |        | 5312435 |           |
|       |                                        | stearate (18:0)                    | C01530 | 5281    | HMDB00827 |
|       |                                        | oleate (18:1n9)                    | C00712 | 445639  | HMDB00207 |
|       |                                        | cis-vaccenate (18:1n7)             | C08367 | 5282761 | HMDB03231 |
|       |                                        | nonadecanoate (19:0)               | C16535 | 12591   | HMDB00772 |
|       |                                        | 10-nonadecenoate (19:1n9)          |        | 5312513 | HMDB13622 |
|       |                                        | arachidate (20:0)                  | C06425 | 10467   | HMDB02212 |
|       |                                        | eicosenoate (20:1n9 or 11)         |        | 5282768 |           |
|       |                                        | behenate (22:0)                    | C08281 | 8215    | HMDB00944 |
|       |                                        | erucate (22:1n9)                   | C08316 | 5281116 | HMDB02068 |
|       | Polyunsaturated Fatty Acid (n3 and n6) | stearidonate (18:4n3)              | C16300 | 5312508 | HMDB06547 |
|       |                                        | eicosapentaenoate (EPA; 20:5n3)    | C06428 | 446284  | HMDB01999 |
|       |                                        | docosapentaenoate (n3 DPA; 22:5n3) | C16513 | 6441454 | HMDB01976 |
|       |                                        | docosahexaenoate (DHA; 22:6n3)     | C06429 | 445580  | HMDB02183 |
|       |                                        | docosatrienoate (22:3n3)           | C16534 | 5312556 | HMDB02823 |
|       |                                        | linoleate (18:2n6)                 | C01595 | 5280450 | HMDB00673 |

|  |                           |                                                      |        |          |           |
|--|---------------------------|------------------------------------------------------|--------|----------|-----------|
|  |                           | linolenate [alpha or gamma; (18:3n3 or 6)]           | C06427 | 5280934  |           |
|  |                           | dihomo-linolenate (20:3n3 or n6)                     | C03242 | 5280581  | HMDB02925 |
|  |                           | arachidonate (20:4n6)                                | C00219 | 444899   | HMDB01043 |
|  |                           | adrenate (22:4n6)                                    | C16527 | 5497181  | HMDB02226 |
|  |                           | docosapentaenoate (n6 DPA; 22:5n6)                   | C16513 | 6441454  | HMDB13123 |
|  |                           | docosadienoate (22:2n6)                              | C16533 | 5282807  |           |
|  |                           | dihomo-linoleate (20:2n6)                            | C16525 | 6439848  | HMDB05060 |
|  |                           | mead acid (20:3n9)                                   |        | 5312531  | HMDB10378 |
|  | Fatty Acid, Branched      | 13-methylmyristic acid                               |        | 151014   |           |
|  |                           | 15-methylpalmitate (isobar with 2-methylpalmitate)   |        | 17903417 |           |
|  |                           | 17-methylstearate                                    |        | 3083779  |           |
|  | Fatty Acid, Dicarboxylate | 2-hydroxyglutarate                                   | C02630 | 43       | HMDB00606 |
|  |                           | maleate (cis-Butenedioate)                           | C01384 | 444266   | HMDB00176 |
|  |                           | pimelate (heptanedioate)                             | C02656 | 385      | HMDB00857 |
|  |                           | suberate (octanedioate)                              | C08278 | 10457    | HMDB00893 |
|  |                           | azelate (nonanedioate)                               | C08261 | 2266     | HMDB00784 |
|  |                           | sebacate (decanedioate)                              | C08277 | 5192     | HMDB00792 |
|  |                           | dodecanedioate                                       | C02678 | 12736    | HMDB00623 |
|  |                           | tetradecanedioate                                    |        | 13185    | HMDB00872 |
|  |                           | hexadecanedioate                                     | C19615 | 10459    | HMDB00672 |
|  |                           | octadecanedioate                                     |        | 70095    | HMDB00782 |
|  |                           | eicosanodioate                                       |        | 75502    |           |
|  |                           | 3-carboxy-4-methyl-5-propyl-2-furanpropanoate (CMPF) |        | 123979   | HMDB61112 |
|  | Fatty Acid, Amide         | palmitic amide                                       |        | 69421    |           |
|  |                           | oleamide                                             | C19670 | 5283387  | HMDB02117 |
|  | Fatty Acid, Amino         | 2-aminoheptanoate                                    |        | 227939   |           |
|  |                           | 2-aminooctanoate                                     |        | 69522    | HMDB00991 |
|  | Fatty Acid Synthesis      | malonate (propanedioate)                             | C00383 | 867      | HMDB00691 |
|  |                           | 2-methylmalonyl carnitine                            |        | 53481628 | HMDB13133 |

|  |                                              |                          |        |                  |           |
|--|----------------------------------------------|--------------------------|--------|------------------|-----------|
|  | Fatty Acid Metabolism (also BCAA Metabolism) | butyrylcarnitine         | C02862 | 439829           | HMDB02013 |
|  |                                              | butyrylglycine           |        | 88412            | HMDB00808 |
|  |                                              | propionylcarnitine       | C03017 | 107738           | HMDB00824 |
|  |                                              | propionylglycine         |        | 98681            | HMDB00783 |
|  |                                              | methymalonate (MMA)      | C02170 | 487              | HMDB00202 |
|  | Fatty Acid Metabolism(Acyl Glycine)          | hexanoylglycine          |        | 99463            | HMDB00701 |
|  |                                              | N-octanoylglycine        |        | 84290            | HMDB00832 |
|  |                                              | N-palmitoyl glycine      |        | 151008           |           |
|  |                                              | N-linoleoylglycine       |        | 6433346          |           |
|  | Fatty Acid Metabolism(Acyl Carnitine)        | l                        | C02571 | 1                | HMDB00201 |
|  |                                              | hydroxybutyrylcarnitine* |        | 53481617         | HMDB13127 |
|  |                                              | valerylcarnitine         |        | 6426903          | HMDB13128 |
|  |                                              | hexanoylcarnitine        |        | 6426853          | HMDB00705 |
|  |                                              | octanoylcarnitine        | C02838 | 123701           | HMDB00791 |
|  |                                              | decanoylcarnitine        |        | 10245190         | HMDB00651 |
|  |                                              | cis-4-decenoyl carnitine |        |                  |           |
|  |                                              | laurylcarnitine          |        | 10427569         | HMDB02250 |
|  |                                              | myristoylcarnitine       |        | 53477791         | HMDB05066 |
|  |                                              | palmitoylcarnitine       | C02990 | 461              | HMDB00222 |
|  |                                              | stearoylcarnitine        |        | 6426855          | HMDB00848 |
|  |                                              | linoleoylcarnitine*      |        | 6450015          | HMDB06469 |
|  |                                              | oleoylcarnitine          |        | 6441392;53477789 | HMDB05065 |
|  |                                              | myristoleoylcarnitine*   |        |                  |           |
|  | Carnitine Metabolism                         | deoxycarnitine           | C01181 | 134              | HMDB01161 |
|  |                                              | carnitine                | C00318 | 10917            | HMDB00062 |
|  | Ketone Bodies                                | acetoacetate             | C00164 | 96               | HMDB00060 |
|  |                                              | 3-hydroxybutyrate (BHBA) | C01089 | 441              | HMDB00357 |
|  | Fatty Acid, Monohydroxy                      | alpha-hydroxycaproate    |        | 99824            | HMDB01624 |
|  |                                              | 2-hydroxyoctanoate       |        | 94180            | HMDB02264 |
|  |                                              | 2-hydroxydecanoate       |        | 21488            |           |
|  |                                              | 2-hydroxypalmitate       |        | 92836            | HMDB31057 |
|  |                                              | 2-hydroxystearate        | C03045 | 69417            |           |
|  |                                              | 3-hydroxypropanoate      | C01013 | 68152            | HMDB00700 |

|  |                         |                                |        |          |           |
|--|-------------------------|--------------------------------|--------|----------|-----------|
|  |                         | 3-hydroxyoctanoate             |        | 26613    | HMDB01954 |
|  |                         | 3-hydroxydecanoate             |        | 26612    | HMDB02203 |
|  |                         | 3-hydroxysebacate              |        | 3017884  | HMDB00350 |
|  |                         | 3-hydroxylaurate               |        | 94216    | HMDB00387 |
|  |                         | 5-hydroxyhexanoate             |        | 170748   | HMDB00525 |
|  |                         | 16-hydroxypalmitate            | C18218 | 10466    | HMDB06294 |
|  |                         | 13-HODE + 9-HODE               |        | 43013    |           |
|  | Fatty Acid, Dihydroxy   | 12,13-DiHOME                   | C14829 | 10236635 | HMDB04705 |
|  |                         | 9,10-DiHOME                    | C14828 | 9966640  | HMDB04704 |
|  |                         | 19,20-DiHDPA                   |        | 16061148 |           |
|  | Eicosanoid (8.51)       | leukotriene B4                 | C02165 | 5280492  | HMDB01085 |
|  |                         | thromboxane B2                 | C05963 | 5283137  | HMDB03252 |
|  |                         | 5-HETE                         | C04805 | 5280733  | HMDB11134 |
|  |                         | 9-HETE                         |        | 5312978  | HMDB10222 |
|  |                         | 12-HETE                        |        | 5312983  | HMDB06111 |
|  |                         | leukotriene B5                 |        | 5283125  | HMDB05073 |
|  | Endocannabinoid         | oleic ethanolamide             |        | 5283454  | HMDB02088 |
|  |                         | palmitoyl ethanolamide         | C16512 | 4671     | HMDB02100 |
|  |                         | N-oleoyltaurine                |        | 6437033  |           |
|  |                         | N-stearoyltaurine              |        | 168274   |           |
|  |                         | N-palmitoyltaurine             |        |          |           |
|  | Inositol Metabolism     | myo-inositol                   | C00137 | 892      | HMDB00211 |
|  |                         | chiro-inositol                 | C19891 |          | HMDB34220 |
|  |                         | scyllo-inositol                | C06153 | 892      | HMDB06088 |
|  |                         | inositol 1-phosphate (I1P)     | C04006 | 440194   | HMDB00213 |
|  | Phospholipid Metabolism | choline                        | C00114 | 305      | HMDB00097 |
|  |                         | choline phosphate              | C00588 | 1014     | HMDB01565 |
|  |                         | glycerophosphorylcholine (GPC) | C00670 | 71920    | HMDB00086 |
|  |                         | glycerophosphoethanolamine     | C01233 | 123874   | HMDB00114 |
|  |                         | trimethylamine N-oxide         | C01104 | 1145     | HMDB00925 |

|           |                                              |        |          |           |
|-----------|----------------------------------------------|--------|----------|-----------|
| Lysolipid | 1-myristoylglycerophosphocholine (14:0)      | C04230 | 460604   | HMDB10379 |
|           | 2-myristoylglycerophosphocholine*            |        |          |           |
|           | 1-myristoleoylglycerophosphocholine (14:1) * |        |          |           |
|           | 1-pentadecanoylglycerophosphocholine (15:0)* |        |          |           |
|           | 1-palmitoylglycerophosphocholine (16:0)      |        | 86554    |           |
|           | 2-palmitoylglycerophosphocholine             |        | 15061532 |           |
|           | 1-palmitoleoylglycerophosphocholine (16:1)*  |        | 24779461 |           |
|           | 2-palmitoleoylglycerophosphocholine*         |        |          |           |
|           | 1-margaroylglycerophosphocholine (17:0)      | C04230 | 24779463 | HMDB12108 |
|           | 2-margaroylglycerophosphocholine*            |        |          |           |
|           | 1-stearoylglycerophosphocholine (18:0)       |        | 497299   |           |
|           | 2-stearoylglycerophosphocholine*             |        | 10208382 |           |

|  |  |                                                   |        |          |           |
|--|--|---------------------------------------------------|--------|----------|-----------|
|  |  | 1-oleoylglycerophosphocholine (18:1)              |        | 16081932 |           |
|  |  | 2-oleoylglycerophosphocholine                     |        |          |           |
|  |  | 1-linoleoylglycerophosphocholine (18:2n6)         | C04100 | 11988421 |           |
|  |  | 2-linoleoylglycerophosphocholine*                 |        |          |           |
|  |  | 1-linolenoylglycerophosphocholine (18:3n3)*       |        |          |           |
|  |  | 2-linolenoylglycerophosphocholine(18:3n3)*        |        |          |           |
|  |  | 1-nonadecanoylglycerophosphocholine(19:0)         |        |          |           |
|  |  | 1-dihomo-linoleoylglycerophosphocholine (20:2n6)* |        |          |           |
|  |  | 1-arachidoylglycerophosphocholine (20:0)          | C04230 | 24779473 | HMDB10390 |
|  |  | 1-eicosenoylglycerophosphocholine (20:1n9)*       |        |          |           |
|  |  | 2-eicosenoylglycerophosphocholine(20:1n9)*        |        |          |           |
|  |  | 1-eicosatrienoylglycerophosphocholine (20:3)*     |        |          |           |
|  |  | 2-eicosatrienoylglycerophosphocholine*            |        |          |           |

|  |  |                                                   |         |  |           |
|--|--|---------------------------------------------------|---------|--|-----------|
|  |  | 1-arachidonoylglycerophosphocholine (20:4n6)*     | C05208  |  |           |
|  |  | 2-arachidonoylglycerophosphocholine*              |         |  |           |
|  |  | 1-eicosapentaenoylglycerophosphocholine (20:5n3)* |         |  |           |
|  |  | 1-docosapentaenoylglycerophosphocholine (22:5n3)* |         |  |           |
|  |  | 2-docosapentaenoylglycerophosphocholine (22:5n3)* |         |  |           |
|  |  | 1-docosapentaenoylglycerophosphocholine (22:5n6)* |         |  |           |
|  |  | 1-docosahexaenoylglycerophosphocholine (22:6n3)*  |         |  |           |
|  |  | 2-docosahexaenoylglycerophosphocholine*           |         |  |           |
|  |  | 1-palmitoylplasmenylethanolamine*                 |         |  |           |
|  |  | 1-stearoylplasmenylethanolamine*                  |         |  |           |
|  |  | 1-oleoylplasmenylethanolamine*                    |         |  |           |
|  |  | 1-palmitoylglycerophosphoethanolamine             | 9547069 |  | HMDB11503 |

|  |  |                                              |  |          |           |
|--|--|----------------------------------------------|--|----------|-----------|
|  |  | 2-palmitoylglycerophosphoethanolamine*       |  |          |           |
|  |  | 1-margaroylglycerophosphoethanolamine*       |  |          |           |
|  |  | 1-stearoylglycerophosphoethanolamine         |  | 9547068  | HMDB11130 |
|  |  | 2-stearoylglycerophosphoethanolamine*        |  |          |           |
|  |  | 1-oleoylglycerophosphoethanolamine           |  | 9547071  | HMDB11506 |
|  |  | 2-oleoylglycerophosphoethanolamine*          |  |          |           |
|  |  | 1-palmitoleoylglycerophosphoethanolamine*    |  |          |           |
|  |  | 1-linoleoylglycerophosphoethanolamine*       |  | 52925130 | HMDB11507 |
|  |  | 2-linoleoylglycerophosphoethanolamine*       |  |          |           |
|  |  | 1-arachidonoylglycerophosphoethanolamine*    |  | 42607465 | HMDB11517 |
|  |  | 2-arachidonoylglycerophosphoethanolamine*    |  |          |           |
|  |  | 2-docosahexaenoylglycerophosphoethanolamine* |  |          |           |

|  |  |                                               |  |  |  |
|--|--|-----------------------------------------------|--|--|--|
|  |  | 1-eicosatrienoylglycerophosphoethanolamine*   |  |  |  |
|  |  | 1-eicosapentaenoylglycerophosphoethanolamine* |  |  |  |
|  |  | 1-docosahexaenoylglycerophosphoethanolamine*  |  |  |  |
|  |  | 1-palmitoylglycerophosphoinositol*            |  |  |  |
|  |  | 1-palmitoleoylglycerophosphoinositol*         |  |  |  |
|  |  | 1-stearoylglycerophosphoinositol              |  |  |  |
|  |  | 2-stearoylglycerophosphoinositol*             |  |  |  |
|  |  | 1-oleoylglycerophosphoinositol*               |  |  |  |
|  |  | 1-linoleoylglycerophosphoinositol*            |  |  |  |
|  |  | 2-linoleoylglycerophosphoinositol*            |  |  |  |
|  |  | 1-arachidonoylglycerophosphoinositol*         |  |  |  |
|  |  | 2-arachidonoylglycerophosphoinositol*         |  |  |  |

|  |                         |                                                  |        |         |           |
|--|-------------------------|--------------------------------------------------|--------|---------|-----------|
|  |                         | 1-stearoylglycerophosphoserine*                  |        | 9547101 |           |
|  |                         | 1-palmitoylglycerophosphate                      | C04036 | 6419701 | HMDB00327 |
|  |                         | 1-arachidonoylglycerophosphate                   |        |         |           |
|  |                         | 1-oleoylglycerophosphate                         |        | 5497152 |           |
|  |                         | 1-palmitoylglycerophosphoglycerol*               |        | 3300276 |           |
|  |                         | 1-stearoylglycerophosphoglycerol                 |        |         |           |
|  |                         | 1-oleoylglycerophosphoglycerol*                  |        |         |           |
|  |                         | 2-nonadecanoylglycerophosphocholine(19:0)*       |        |         |           |
|  |                         | palmitoyl-arachidonoylglycerophosphocholine (1)* |        |         |           |
|  |                         | palmitoyl-arachidonoylglycerophosphocholine (2)* |        |         |           |
|  |                         | palmitoyl-linoleoylglycerophosphocholine (1)*    |        |         |           |
|  |                         | palmitoyl-linoleoylglycerophosphocholine (2)*    |        |         |           |
|  |                         | palmitoyl-oleoylglycerophosphocholine (1)*       |        |         |           |
|  |                         | stearoyl-arachidonoylglycerophosphoinositol (1)* |        |         |           |
|  |                         | stearoyl-linoleoylglycerophosphocholine (1)*     |        |         |           |
|  |                         | stearoyl-linoleoylglycerophosphocholine (2)*     |        |         |           |
|  | Glycerolipid Metabolism | glycerol                                         | C00116 | 753     | HMDB00131 |

|  |                         |                                                   |        |          |           |
|--|-------------------------|---------------------------------------------------|--------|----------|-----------|
|  |                         | glycerol 3-phosphate (G3P)                        | C00093 | 754      | HMDB00126 |
|  | Monoacylglycerol        | 1-myristoylglycerol (1-monomyristin)              | C01885 | 79050    | HMDB11561 |
|  |                         | 2-myristoylglycerol (2-monomyristin)              |        | 137938   |           |
|  |                         | 1-pentadecanoylglycerol (1-monopentadecanoin)     |        | 190750   |           |
|  |                         | 1-palmitoylglycerol (1-monopalmitin)              |        | 14900    | HMDB31074 |
|  |                         | 2-palmitoylglycerol (2-monopalmitin)              |        | 123409   | HMDB11533 |
|  |                         | 1-stearoylglycerol (1-monostearin)                | D01947 | 24699    | HMDB31075 |
|  |                         | 2-stearoylglycerol (2-monostearin)                |        | 79075    |           |
|  |                         | 1-oleoylglycerol (1-monoolein)                    |        | 5283468  | HMDB11567 |
|  |                         | 2-oleoylglycerol (2-monoolein)                    |        | 5319879  |           |
|  |                         | 1-linoleoylglycerol (1-monolinolein)              |        | 5283469  |           |
|  |                         | 2-linoleoylglycerol (2-monolinolein)              |        | 5365676  | HMDB11538 |
|  |                         | 1-arachidonoylglycerol                            | C13857 | 5282281  | HMDB11572 |
|  |                         | 2-arachidonoyl glycerol                           | C13856 | 5282280  | HMDB04666 |
|  |                         | 1-docosahexaenoylglycerol (1-monodocosahexaenoin) |        |          |           |
|  |                         | 1-dihomo-linolenylglycerol (alpha, gamma)         |        |          |           |
|  | Sphingolipid Metabolism | sphinganine                                       | C00836 | 3126     | HMDB00269 |
|  |                         | palmitoyl sphingomyelin                           |        | 9939941  |           |
|  |                         | stearoyl sphingomyelin                            | C00550 | 6453725  | HMDB01348 |
|  |                         | oleoyl sphingomyelin                              |        | 6443882  |           |
|  |                         | sphingosine 1-phosphate                           | C06124 | 5283560  | HMDB00277 |
|  |                         | sphingosine                                       | C00319 | 5353955  | HMDB00252 |
|  |                         | myristoyl sphingomyelin*                          |        | 11433862 |           |

|  |                       |                                                       |        |          |           |
|--|-----------------------|-------------------------------------------------------|--------|----------|-----------|
|  |                       | myristoleoyl sphingomyelin*                           |        |          |           |
|  |                       | nervonoyl sphingomyelin*                              |        |          |           |
|  |                       | palmitoleoyl sphingomyelin*                           |        |          |           |
|  | Mevalonate Metabolism | 3-hydroxy-3-methylglutarate                           | C03761 | 1662     | HMDB00355 |
|  | Sterol                | lathosterol                                           | C01189 | 65728    | HMDB01170 |
|  |                       | cholesterol                                           | C00187 | 11025495 | HMDB00067 |
|  |                       | 7-alpha-hydroxy-3-oxo-4-cholestenoate (7-Hoca)        | C17337 | 3081085  | HMDB12458 |
|  |                       | beta-sitosterol                                       | C01753 | 222284   | HMDB00852 |
|  |                       | campesterol                                           | C01789 | 173183   | HMDB02869 |
|  | Steroid               | pregnenolone sulfate                                  |        | 105074   | HMDB00774 |
|  |                       | 21-hydroxypregnenolone monosulfate (1)                |        | 174681   |           |
|  |                       | 21-hydroxypregnenolone monosulfate (2)                |        | 10670474 |           |
|  |                       | 21-hydroxypregnenolone disulfate                      | C05485 | 134595   | HMDB04026 |
|  |                       | 5alpha-pregnan-3alpha-ol,20-one sulfate               |        |          |           |
|  |                       | 5alpha-pregnan-3beta,20beta-diol monosulfate (1)      |        |          |           |
|  |                       | 5alpha-pregnan-3beta,20alpha-diol monosulfate (2)     |        |          |           |
|  |                       | 5alpha-pregnan-3beta,20alpha-diol disulfate           |        |          |           |
|  |                       | 5alpha-pregnan-3(alpha or beta),20beta-diol disulfate |        | 5127902  |           |
|  |                       | pregnen-diol disulfate*                               |        |          |           |
|  |                       | pregn steroid monosulfate*                            |        |          |           |
|  |                       | pregnenediol-3-glucuronide                            |        | 123796   |           |
|  |                       | cortisol                                              | C00735 | 5754     | HMDB00063 |
|  |                       | corticosterone                                        | C02140 | 5753     | HMDB01547 |
|  |                       | 11-dehydrocorticosterone                              |        |          |           |
|  |                       | cortisone                                             | C00762 | 222786   | HMDB02802 |

|  |                                                     |        |        |           |
|--|-----------------------------------------------------|--------|--------|-----------|
|  | dehydroisoandrosterone sulfate (DHEA-S)             | C04555 | 12594  | HMDB01032 |
|  | 16a-hydroxy DHEA 3-sulfate                          |        |        |           |
|  | epiandrosterone sulfate                             | C07635 |        | HMDB00365 |
|  | androsterone sulfate                                |        | 159663 | HMDB02759 |
|  | 4-androsten-3beta,17beta-diol monosulfate (1)       |        |        | HMDB03818 |
|  | 4-androsten-3beta,17beta-diol monosulfate (2)       |        |        |           |
|  | 4-androsten-3alpha,17alpha-diol monosulfate (2)     |        |        |           |
|  | 4-androsten-3alpha,17alpha-diol monosulfate (3)     |        |        |           |
|  | 4-androsten-3beta,17beta-diol disulfate (1)         | C04295 | 10634  | HMDB03818 |
|  | 4-androsten-3beta,17beta-diol disulfate (2)         | C04295 | 10634  | HMDB03818 |
|  | 5alpha-androstan-3beta,17beta-diol monosulfate (1)  |        |        |           |
|  | 5alpha-androstan-3alpha,17beta-diol monosulfate (1) |        |        |           |
|  | 5alpha-androstan-3alpha,17alpha-diol monosulfate    |        |        |           |
|  | 5alpha-androstan-3beta,17beta-diol monosulfate (2)  |        |        |           |
|  | 5alpha-androstan-3alpha,17alpha-diol disulfate      |        |        |           |
|  | 5alpha-androstan-3beta,17alpha-diol disulfate       |        |        |           |
|  | 5alpha-androstan-3alpha,17beta-diol disulfate       |        |        |           |
|  | 5alpha-androstan-3beta,17beta-diol disulfate        | C12525 | 242332 | HMDB00493 |

|  |                                |                                                     |        |          |           |
|--|--------------------------------|-----------------------------------------------------|--------|----------|-----------|
|  |                                | andro steroid monosulfate (1)*                      | C04555 |          | HMDB02759 |
|  |                                | estrone 3-sulfate                                   | C02538 | 3001028  | HMDB01425 |
|  |                                | testosterone sulfate                                | C00535 | 119207   | HMDB02833 |
|  |                                | 11-ketoetiocholanolone glucuronide                  |        |          |           |
|  |                                | etiocholanolone glucuronide                         |        |          |           |
|  |                                | 5alpha-androstan-3alpha,17beta-diol monosulfate (2) |        |          |           |
|  |                                | 17alpha-hydroxypregnanolone glucuronide             |        |          |           |
|  |                                | 5alpha-pregnan-3alpha,20beta-diol monosulfate (4)   |        |          |           |
|  | Primary Bile Acid Metabolism   | cholate                                             | C00695 | 221493   | HMDB00619 |
|  |                                | glycocholate                                        | C01921 | 10140    | HMDB00138 |
|  |                                | taurocholate                                        | C05122 | 6675     | HMDB00036 |
|  |                                | chenodeoxycholate                                   | C02528 | 10133    | HMDB00518 |
|  |                                | glycochenodeoxycholate                              | C05466 | 12544    | HMDB00637 |
|  |                                | taurochenodeoxycholate                              | C05465 | 387316   | HMDB00951 |
|  |                                | tauro-beta-muricholate                              |        | 168408   | HMDB00932 |
|  | Secondary Bile Acid Metabolism | deoxycholate                                        | C04483 | 222528   | HMDB00626 |
|  |                                | glycodeoxycholate                                   | C05464 | 3035026  | HMDB00631 |
|  |                                | taurodeoxycholate                                   | C05463 | 2733768  | HMDB00896 |
|  |                                | glycolithocholate                                   | C15557 | 115245   | HMDB00698 |
|  |                                | glycolithocholate sulfate*                          | C11301 | 72222    | HMDB02639 |
|  |                                | taurolithocholate                                   | C02592 | 10595    | HMDB00722 |
|  |                                | taurolithocholate 3-sulfate                         | C03642 | 440071   | HMDB02580 |
|  |                                | ursodeoxycholate                                    | C07880 | 31401    | HMDB00946 |
|  |                                | glycoursodeoxycholate                               |        | 12310288 | HMDB00708 |
|  |                                | tauroursodeoxycholate                               |        | 9848818  | HMDB00874 |
|  |                                | 7-ketolithocholate                                  |        | 444262   | HMDB00467 |

|            |                                                      |                                             |        |         |           |
|------------|------------------------------------------------------|---------------------------------------------|--------|---------|-----------|
|            |                                                      | glycohyocholate                             |        |         |           |
|            |                                                      | hyodeoxycholate                             | C15517 | 5283820 | HMDB00733 |
|            |                                                      | glycocholenate sulfate*                     |        |         |           |
|            |                                                      | taurocholenate sulfate                      |        |         |           |
|            |                                                      | 7-ketodeoxycholate                          |        | 188292  | HMDB00391 |
|            |                                                      | 3beta,7alpha-dihydroxy-5-cholestenoate      |        |         |           |
|            |                                                      | 3b-hydroxy-5-cholenoic acid                 |        | 92997   | HMDB00308 |
| Nucleotide | Purine Metabolism, (Hypo)Xanthine/Inosine containing | inosine                                     | C00294 | 6021    | HMDB00195 |
|            |                                                      | hypoxanthine                                | C00262 | 790     | HMDB00157 |
|            |                                                      | xanthine                                    | C00385 | 1188    | HMDB00292 |
|            |                                                      | xanthosine                                  | C01762 | 64959   | HMDB00299 |
|            |                                                      | urate                                       | C00366 | 1175    | HMDB00289 |
|            |                                                      | allantoin                                   | C02350 | 204     | HMDB00462 |
|            | Purine Metabolism, Adenine containing (7.30)         | adenosine 3',5'-cyclic monophosphate (cAMP) | C00575 | 6076    | HMDB00058 |
|            |                                                      | adenosine                                   | C00212 | 60961   | HMDB00050 |
|            |                                                      | adenine                                     | C00147 | 190     | HMDB00034 |
|            |                                                      | N1-methyladenosine                          | C02494 | 27476   | HMDB03331 |
|            |                                                      | N6-methyladenosine                          |        | 102175  | HMDB04044 |
|            |                                                      | N6-carbamoylthreonyladenosine               |        | 161466  | HMDB41623 |
|            |                                                      | N6-succinyladenosine                        |        |         | HMDB00912 |
|            |                                                      |                                             |        |         |           |
|            | Purine Metabolism, Guanine containing (17.02)        | guanosine                                   | C00387 | 6802    | HMDB00133 |
|            |                                                      | 7-methylguanine                             | C02242 | 11361   | HMDB00897 |
|            |                                                      | 2'-O-methylguanosine                        | C04545 |         |           |
|            |                                                      | N1-methylguanosine                          |        | 96373   | HMDB01563 |
|            |                                                      | N2-methylguanosine                          |        | 3035422 | HMDB05862 |
|            |                                                      | N2,N2-dimethylguanosine                     |        | 92919   | HMDB04824 |
|            | Pyrimidine Metabolism, Orotate containing            | dihydroorotate                              | C00337 | 648     | HMDB03349 |
|            |                                                      | orotate                                     | C00295 | 967     | HMDB00226 |
|            |                                                      | orotidine                                   | C01103 | 92751   | HMDB00788 |
|            | Pyrimidine Metabolism, Uracil                        | uridine                                     | C00299 | 6029    | HMDB00296 |

|                        |                                                    |                                    |        |          |           |
|------------------------|----------------------------------------------------|------------------------------------|--------|----------|-----------|
|                        | containing                                         | uracil                             | C00106 | 1174     | HMDB00300 |
|                        |                                                    | pseudouridine                      | C02067 | 15047    | HMDB00767 |
|                        |                                                    | 5-methyluridine (ribothymidine)    |        | 445408   | HMDB00884 |
|                        |                                                    | 3'-O-Methyluridine                 |        |          |           |
|                        |                                                    | 5,6-dihydrouracil                  | C00429 | 649      | HMDB00076 |
|                        |                                                    | 2'-deoxyuridine                    | C00526 | 13712    | HMDB00012 |
|                        |                                                    | 3-ureidopropionate                 | C02642 | 111      | HMDB00026 |
|                        |                                                    | beta-alanine                       | C00099 | 239      | HMDB00056 |
|                        |                                                    | N-acetyl-beta-alanine              | C01073 | 76406    |           |
|                        | Pyrimidine Metabolism, Cytidine containing (25.53) | cytidine                           | C00475 | 6175     | HMDB00089 |
|                        |                                                    | N4-acetylcytidine                  |        | 107461   | HMDB05923 |
|                        | Pyrimidine Metabolism, Thymine containing          | 5,6-dihydrothymine                 | C00906 | 93556    | HMDB00079 |
|                        | Purine and Pyrimidine Metabolism                   | methylphosphate                    |        | 13130    |           |
| Cofactors and Vitamins | Nicotinate and Nicotinamide Metabolism             | quinolinate                        | C03722 | 1066     | HMDB00232 |
|                        |                                                    | nicotinamide                       | C00153 | 936      | HMDB01406 |
|                        |                                                    | 1-methylnicotinamide               | C02918 | 10129985 | HMDB00699 |
|                        |                                                    | trigonelline (N'-methylnicotinate) | C01004 | 5570     | HMDB00875 |
|                        |                                                    | N1-Methyl-2-pyridone-5-carboxamide | C05842 | 69698    | HMDB04193 |
|                        | Riboflavin Metabolism                              | riboflavin (Vitamin B2)            | C00255 | 493570   | HMDB00244 |
|                        | Pantothenate and CoA Metabolism                    | pantothenate                       | C00864 | 6613     | HMDB00210 |
|                        | Ascorbate and Aldarate Metabolism                  | ascorbate (Vitamin C)              | C00072 |          | HMDB00044 |
|                        |                                                    | threonate                          | C01620 | 151152   | HMDB00943 |
|                        |                                                    | arabonate                          | C00878 | 122045   | HMDB00539 |
|                        |                                                    | oxalate (ethanedioate)             | C00209 | 971      | HMDB02329 |
|                        |                                                    | gulonic acid*                      |        | 9794176  |           |
|                        | Tocopherol Metabolism                              | alpha-tocopherol                   | C02477 | 14985    | HMDB01893 |
|                        |                                                    | beta-tocopherol                    | C14152 | 6857447  | HMDB06335 |
|                        |                                                    | gamma-tocopherol                   | C02483 | 14986    | HMDB01492 |

|             |                                     |                                   |        |         |           |
|-------------|-------------------------------------|-----------------------------------|--------|---------|-----------|
|             |                                     | gamma-CEHC                        |        | 133098  | HMDB01931 |
|             |                                     | gamma-CEHC glucuronide*           |        |         |           |
|             |                                     | alpha-CEHC glucuronide*           |        |         |           |
|             |                                     | alpha-CEHC sulfate                |        |         |           |
|             | Tetrahydrobiopterin Metabolism      | biopterin                         | C06313 | 445040  | HMDB00468 |
|             | Hemoglobin and Porphyrin Metabolism | bilirubin (Z,Z)                   | C00486 | 5280352 | HMDB00054 |
|             |                                     | bilirubin (E,E)*                  |        | 5315454 |           |
|             |                                     | bilirubin (E,Z or Z,E)*           |        | 5799469 |           |
|             |                                     | biliverdin                        | C00500 | 5353439 | HMDB01008 |
|             |                                     | l-urobilinogen                    | C05790 | 26818   | HMDB04157 |
|             |                                     | L-urobilin                        | C05793 | 5280818 | HMDB04159 |
|             | Vitamin B6 Metabolism               | pyridoxate                        | C00847 | 6723    | HMDB00017 |
| Xenobiotics | Benzoate Metabolism                 | hippurate                         | C01586 | 464     | HMDB00714 |
|             |                                     | 2-hydroxyhippurate (salicylurate) | C07588 | 10253   | HMDB00840 |
|             |                                     | 3-hydroxyhippurate                |        | 450268  | HMDB06116 |
|             |                                     | 4-hydroxyhippurate                |        | 151012  | HMDB13678 |
|             |                                     | benzoate                          | C00180 | 243     | HMDB01870 |
|             |                                     | 4-hydroxybenzoate                 | C00156 | 135     | HMDB00500 |
|             |                                     | catechol sulfate                  | C00090 | 3083879 | HMDB59724 |
|             |                                     | O-methylcatechol sulfate          |        | 22473   |           |
|             |                                     | 3-methyl catechol sulfate (1)     |        |         |           |
|             |                                     | 3-methyl catechol sulfate (2)     |        |         |           |
|             |                                     | 4-methylcatechol sulfate          |        |         |           |
|             |                                     | methyl-4-hydroxybenzoate          | D01400 | 7456    | HMDB32572 |
|             |                                     | 2-ethylphenylsulfate              |        |         |           |
|             |                                     | 3-ethylphenylsulfate              | C14386 |         |           |
|             |                                     | 4-ethylphenylsulfate              | C13637 |         |           |
|             |                                     | 4-vinylphenol sulfate             | C05627 | 6426766 | HMDB04072 |
|             | Xanthine Metabolism                 | caffeine                          | C07481 | 2519    | HMDB01847 |
|             |                                     | paraxanthine                      | C13747 | 4687    | HMDB01860 |
|             |                                     | theobromine                       | C07480 | 5429    | HMDB02825 |

|  |                            |                                            |        |          |           |
|--|----------------------------|--------------------------------------------|--------|----------|-----------|
|  |                            | theophylline                               | C07130 | 2153     | HMDB01889 |
|  |                            | 1-methylurate                              | C16359 | 69726    | HMDB03099 |
|  |                            | 7-methylurate                              |        | 69160    |           |
|  |                            | 1,3-dimethylurate                          |        | 70346    | HMDB01857 |
|  |                            | 1,7-dimethylurate                          | C16356 | 91611    | HMDB11103 |
|  |                            | 3,7-dimethylurate                          | C16360 | 83126    | HMDB01982 |
|  |                            | 1,3,7-trimethylurate                       | C16361 | 79437    | HMDB02123 |
|  |                            | 1-methylxanthine                           | C16358 | 80220    | HMDB10738 |
|  |                            | 3-methylxanthine                           | C16357 | 70639    | HMDB01886 |
|  |                            | 7-methylxanthine                           | C16353 | 68374    | HMDB01991 |
|  |                            | 5-acetylamino-6-amino-3-methyluracil       | C16366 | 88299    | HMDB04400 |
|  |                            | 5-acetylamino-6-formylamino-3-methyluracil | C16365 | 108214   | HMDB11105 |
|  | Tobacco Metabolite         | cotinine                                   |        | 854019   | HMDB01046 |
|  |                            | hydroxycotinine                            |        | 10219774 | HMDB01390 |
|  |                            | cotinine N-oxide                           |        | 9815514  | HMDB01411 |
|  | Food Component/Plant (1.7) | 2-piperidinone                             |        | 12665    |           |
|  |                            | sucralose                                  | C12285 | 71485    | HMDB31554 |
|  |                            | levulinate (4-oxovalerate)                 |        | 11579    | HMDB00720 |
|  |                            | 1,6-anhydroglucose                         |        | 2724705  | HMDB00640 |
|  |                            | 2,3-dihydroxyisovalerate                   | C04039 | 677      | HMDB12141 |
|  |                            | 2-isopropylmalate                          | C02504 | 77       | HMDB00402 |
|  |                            | 2-oxindole-3-acetate                       |        | 3080590  |           |
|  |                            | 3-hydroxyindolin-2-one                     | C11130 | 6097     |           |
|  |                            | betonicine                                 | C08269 | 164642   | HMDB29412 |
|  |                            | gluconate                                  | C00257 | 10690    | HMDB00625 |
|  |                            | N-acetylalliin                             |        |          |           |
|  |                            | cinnamoylglycine                           |        | 709625   | HMDB11621 |
|  |                            | dihydroferulic acid                        |        | 14340    |           |
|  |                            | ergothioneine                              | C05570 | 3032311  | HMDB03045 |
|  |                            | erythritol                                 | C00503 | 222285   | HMDB02994 |
|  |                            | ferulate                                   | C01494 | 445858   | HMDB00954 |

|  |                  |                                          |        |          |           |
|--|------------------|------------------------------------------|--------|----------|-----------|
|  |                  | ferulic acid 4-sulfate                   |        | 6305574  | HMDB29200 |
|  |                  | glycyrrhetinate                          | C02283 | 18526330 | HMDB11628 |
|  |                  | homostachydrine*                         | C08283 | 441447   | HMDB33433 |
|  |                  | methyl indole-3-acetate                  |        | 74706    | HMDB29738 |
|  |                  | N-(2-furoyl)glycine                      |        | 21863    | HMDB00439 |
|  |                  | piperine                                 | C03882 | 638024   | HMDB29377 |
|  |                  | quinate                                  | C00296 | 6508     | HMDB03072 |
|  |                  | saccharin                                | D01085 | 5143     | HMDB29723 |
|  |                  | stachydrine                              | C10172 | 115244   | HMDB04827 |
|  |                  | tartarate                                | C00898 | 444305   | HMDB00956 |
|  |                  | theanine                                 | C01047 | 439378   | HMDB34365 |
|  |                  | thymol sulfate                           | C09908 |          | HMDB01878 |
|  |                  | 4-allylphenol sulfate                    |        |          |           |
|  |                  | methyl glucopyranoside (alpha + beta)    |        |          |           |
|  | Bacterial/Fungal | tartronate (hydroxymalonate)             | C02287 | 45       | HMDB35227 |
|  | Drug             | vancomycin                               |        | 14969    |           |
|  |                  | 2-hydroxyacetaminophen sulfate*          |        |          |           |
|  |                  | 2-methoxyacetaminophen sulfate*          |        |          |           |
|  |                  | 3-(cystein-S-yl)acetaminophen*           |        | 5233914  |           |
|  |                  | 3-(N-acetyl-L-cystein-S-yl)acetaminophen |        | 83967    |           |
|  |                  | 4-acetaminophen sulfate                  | C06804 | 83939    | HMDB59911 |
|  |                  | 4-acetamidophenol                        | C06804 | 1983     | HMDB01859 |
|  |                  | p-acetamidophenylglucuronide             |        | 83944    | HMDB10316 |
|  |                  | 2-methoxyacetaminophen glucuronide*      |        |          |           |
|  |                  | salicyluric glucuronide*                 |        |          |           |
|  |                  | ibuprofen acyl glucuronide               |        | 163959   |           |
|  |                  | ibuprofen                                | D00126 | 3672     | HMDB01925 |

|  |                                    |        |          |           |
|--|------------------------------------|--------|----------|-----------|
|  | 2-hydroxyibuprofen                 |        |          |           |
|  | carboxyibuprofen                   |        | 10444113 |           |
|  | 1-hydroxy-2-naphthalenecarboxylate | C03203 | 6844     |           |
|  | 4-acetylphenol sulfate             |        | 4684006  |           |
|  | 6-oxopiperidine-2-carboxylic acid  |        | 3014237  |           |
|  | allopurinol                        |        | 2094     |           |
|  | allopurinol riboside               |        |          |           |
|  | amphotericin B                     | C06573 | 5280965  | HMDB14819 |
|  | codeine                            | C06174 | 5284371  | HMDB04995 |
|  | O-desmethylvenlafaxine             |        |          |           |
|  | doxycycline                        |        |          |           |
|  | escitalopram                       |        | 146570   | HMDB05028 |
|  | furosemide                         | D00331 | 3440     | HMDB01933 |
|  | hydrochlorothiazide                | C07041 | 3639     | HMDB01928 |
|  | hydroquinone sulfate               | C00530 | 161220   | HMDB02434 |
|  | lidocaine                          | D00358 | 3676     | HMDB14426 |
|  | metformin                          | C07151 | 4091     | HMDB01921 |
|  | methotrexate                       | C01937 | 126941   | HMDB14703 |
|  | metoprolol                         | D02358 | 4171     | HMDB01932 |
|  | metoprolol acid metabolite*        |        | 62936    |           |
|  | N-ethylglycinexylidide             | C16561 | 24415    | HMDB60656 |
|  | omeprazole                         | C07324 | 4594     | HMDB01913 |
|  | oxypurinol                         | D02365 | 4644     | HMDB00786 |
|  | pantoprazole                       | C11806 | 4679     | HMDB05017 |
|  | pivaloylcarnitine                  |        | 126894   | HMDB41993 |
|  | ranitidine                         | D00422 | 3001055  | HMDB01930 |
|  | salicylate                         | C00805 | 338      | HMDB01895 |
|  | venlafaxine                        | C07187 | 5656     | HMDB05016 |
|  | veratric acid                      |        | 7121     |           |
|  | warfarin                           |        |          |           |
|  | N,O-didesmethyl venlafaxine*       |        | 3451347  |           |

|  |                |                                            |        |                   |           |
|--|----------------|--------------------------------------------|--------|-------------------|-----------|
|  |                | N,O-didesmethylvenlafaxine glucuronide*    |        |                   |           |
|  | Chemical (3.4) | 1,2-propanediol                            | C00583 | 1030              | HMDB01881 |
|  |                | 2-pyrrolidinone                            |        | 12025             | HMDB02039 |
|  |                | sulfate*                                   | C00059 | 1118              | HMDB01448 |
|  |                | O-sulfo-L-tyrosine                         |        | 514186            |           |
|  |                | ethyl glucuronide                          |        | 152226            |           |
|  |                | 2-aminophenol sulfate                      |        | 181670            | HMDB61116 |
|  |                | 2-ethylhexanoate                           |        | 8697              | HMDB31230 |
|  |                | 2-hydroxyisobutyrate                       |        | 11671             | HMDB00729 |
|  |                | S-(3-hydroxypropyl)mercapturic acid (HPMA) |        | 3371179           |           |
|  |                | dimethyl sulfone                           | C11142 | 6213              | HMDB04983 |
|  |                | ectoine                                    | C06231 | 126041            |           |
|  |                | HEPES                                      |        | 23831             |           |
|  |                | pepstatin A                                |        |                   |           |
|  |                | phenylcarnitine*                           |        |                   |           |
|  |                | N-methylpipecolate                         |        | 11862129;11286529 |           |
